# Supplementary material
Source: PubMed Central journal article supplement (PMC3181126)
Supplement: NIHMS312894-supplement-1_si_001.pdf [file NIHMS312894-supplement-1_si_001.pdf]

## Supporting Information

### Fluorescent Derivatives of $\sigma$ Receptor Ligand 1-Cyclohexyl-4-[3-(5-methoxy-1,2,3,4-tetrahydronaphthalen-1-yl)propyl]piperazine (PB28) as a Tool for Uptake and Cellular Localization Studies in Pancreatic Tumor Cells

*Carmen Abate,<sup>‡\*</sup> John R. Hornick,<sup>§</sup> Dirk Spitzer,<sup>§</sup> William G Hawkins,<sup>§</sup> Mauro Niso,<sup>‡</sup> Roberto Perrone<sup>‡</sup> and Francesco Berardi<sup>‡</sup>*

<sup>‡</sup>*Dipartimento Farmacochimico, Università degli Studi di Bari ALDO MORO, Via Orabona 4, I-70125 Bari, Italy*

<sup>§</sup>*Division of Hepatobiliary, Pancreatic, and Gastrointestinal Surgery, Department of Surgery, Washington University School of Medicine, St. Louis, MO*

Table of contents (total of 4 pages)

Elemental analyses, Page S2.

Table of Physical Properties of Novel Compounds, Page S3.

Supplemental Figure 1. Subcellular Colocalization of **16** by Fluorescence Microscopy, Page S4.

### Table of Elemental Analysis

| Compound  | Calculated |      |       | Found |      |       |
|-----------|------------|------|-------|-------|------|-------|
|           | C          | H    | N     | C     | H    | N     |
| <b>7</b>  | 54.53      | 7.15 | 12.69 | 54.41 | 7.09 | 12.56 |
| <b>8</b>  | 55.59      | 7.85 | 7.91  | 55.89 | 7.45 | 7.83  |
| <b>16</b> | 56.00      | 7.45 | 11.19 | 56.00 | 7.06 | 11.45 |
| <b>17</b> | 55.35      | 6.90 | 11.74 | 55.58 | 7.13 | 11.98 |
| <b>18</b> | 59.66      | 8.06 | 6.79  | 59.47 | 7.67 | 6.76  |
| <b>19</b> | 59.57      | 7.56 | 7.13  | 59.77 | 7.49 | 7.12  |

**Table of Physical Properties of Novel Compounds**

| Compound | Formula <sup>a</sup>                                                                                               | mp, °C <sup>b</sup> | Color of crystals |
|----------|--------------------------------------------------------------------------------------------------------------------|---------------------|-------------------|
| 7        | C <sub>35</sub> H <sub>51</sub> N <sub>7</sub> O <sub>4</sub> ·3.8HCl                                              | > 250               | orange            |
| 8        | C <sub>41</sub> H <sub>61</sub> N <sub>5</sub> O <sub>3</sub> S·4HCl·2H <sub>2</sub> O                             | 248 (dec)           | yellow            |
| 16       | C <sub>35</sub> H <sub>50</sub> N <sub>6</sub> O <sub>4</sub> ·3HCl· <sup>5</sup> / <sub>4</sub> H <sub>2</sub> O  | 223 (dec)           | orange            |
| 17       | C <sub>33</sub> H <sub>46</sub> N <sub>6</sub> O <sub>5</sub> ·3HCl                                                | 246–248             | orange            |
| 18       | C <sub>41</sub> H <sub>60</sub> N <sub>4</sub> O <sub>3</sub> S·3HCl· <sup>3</sup> / <sub>2</sub> H <sub>2</sub> O | 215 (dec)           | yellow            |
| 19       | C <sub>39</sub> H <sub>56</sub> N <sub>4</sub> O <sub>4</sub> S·3HCl                                               | 220 (dec)           | yellow            |

<sup>a</sup>Elemental analyses were within ± 0.4% of the theoretical values for the formulas given.  
<sup>b</sup>Recrystallized from MeOH/Et<sub>2</sub>O except for compound 8 which was Recrystallized from MeOH.

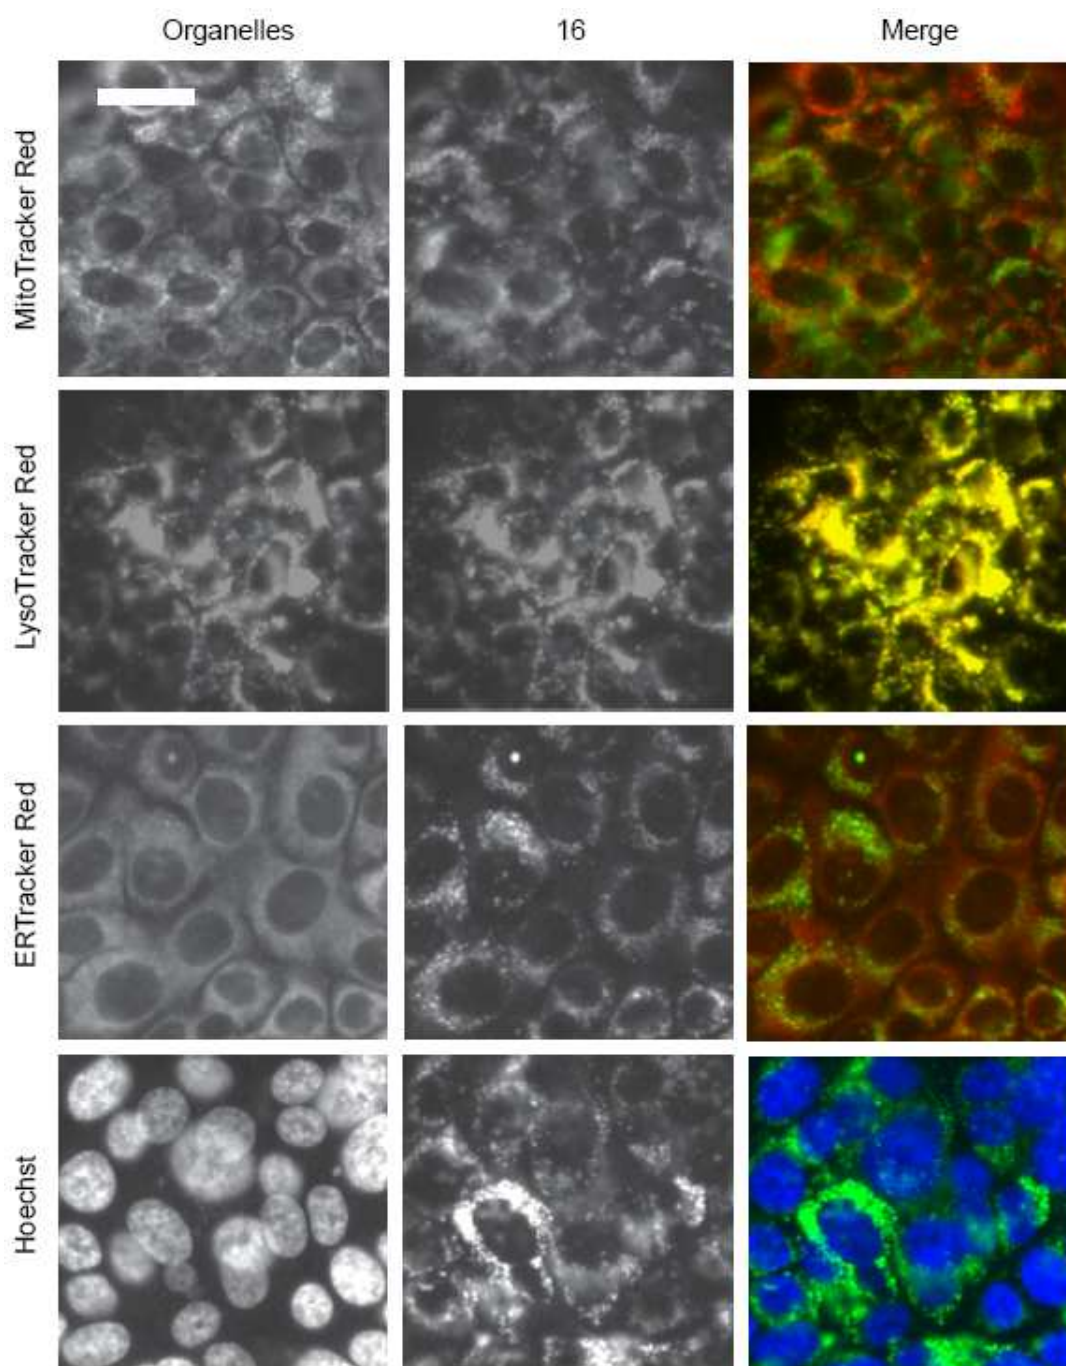

**Supplemental Figure 1.** Subcellular Colocalization of compound **16** by Fluorescence Microscopy. Bxpc3 pancreatic cancer cells were incubated with **16** and subcellular markers, as described in the Materials and Methods, and imaged by fluorescence microscopy. **16** is presented as green, organelle markers in red, and overlays in yellow, scale bar equals 20  $\mu\text{m}$ . Images taken at 40X magnification on a Nikon light microscope fitted with a SPOT camera and software.
